# Supplementary material for: Identification of the FSH-RH as the other gonadotropin-releasing hormone
Source: PubMed Central journal article supplement (PMC11211334; doi:10.1038/s41467-024-49564-8), 2024-06-27
Supplement: 41467_2024_49564_MOESM1_ESM.pdf [file 41467_2024_49564_MOESM1_ESM.pdf]

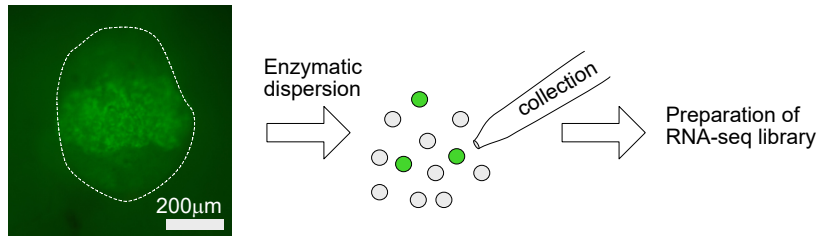

**Supplementary Fig. 1. Schematic of FSH-specific RNA-seq by using FSH-GFP transgenic medaka.**

Left fluorescent image is the pituitary of the FSH-GFP transgenic medaka. Sub-region where FSH cells are localized show GFP fluorescence. Dotted line indicates the edge of the whole pituitary. The pituitary of the FSH-GFP transgenic medaka was excised and subjected to enzymatic dispersion. Then, the GFP positive FSH cells were collected and RNA-seq was performed.

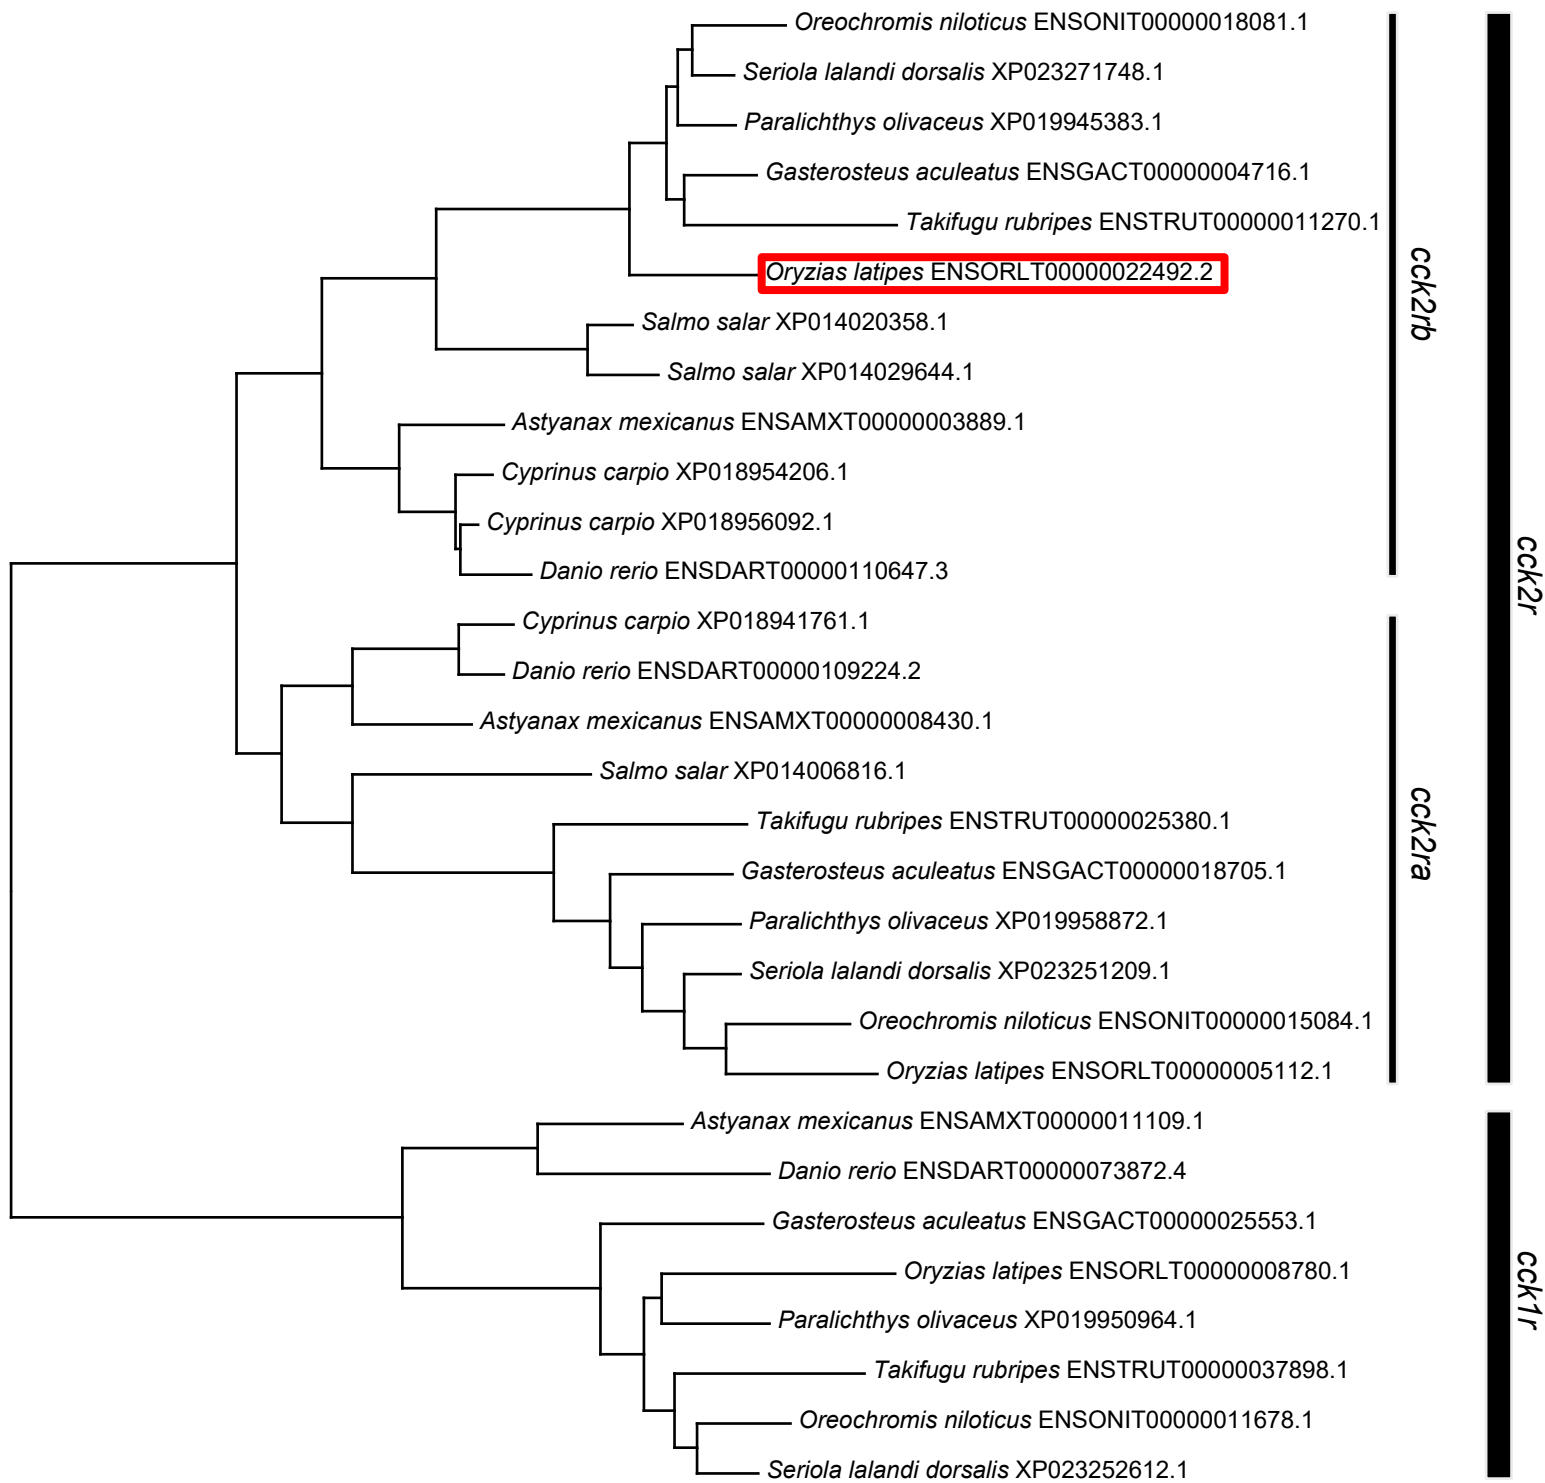

**Supplementary Fig. 2. Phylogenetic tree of cholecystokinin (cck1 and cck2) receptors.**

Maximum likelihood tree of the CCK receptors based on a part of deduced amino acid sequence of each gene. Species name and the accession number for each species are indicated in the tree.

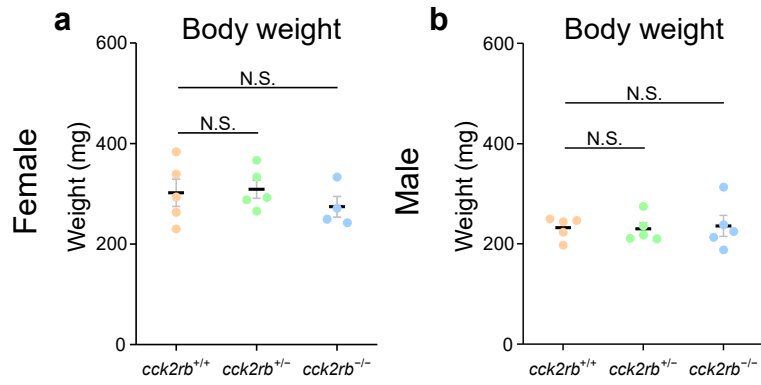

**Supplementary Fig. 3. The body weight does not change among *cck2rb*<sup>+/+</sup>, *cck2rb*<sup>+/-</sup>, and *cck2rb*<sup>-/-</sup>.**

**a,b** Body weight of *cck2rb*<sup>+/+</sup>, *cck2rb*<sup>+/-</sup>, and *cck2rb*<sup>-/-</sup> female (a) and male (b) medaka ( $n = 5$  fish). No significant change of body weight was observed among them. The data are mean  $\pm$  SEM. N.S., not significant, two-sided Dunnett's test (**a,b**). Source data are provided as a Source Data file.

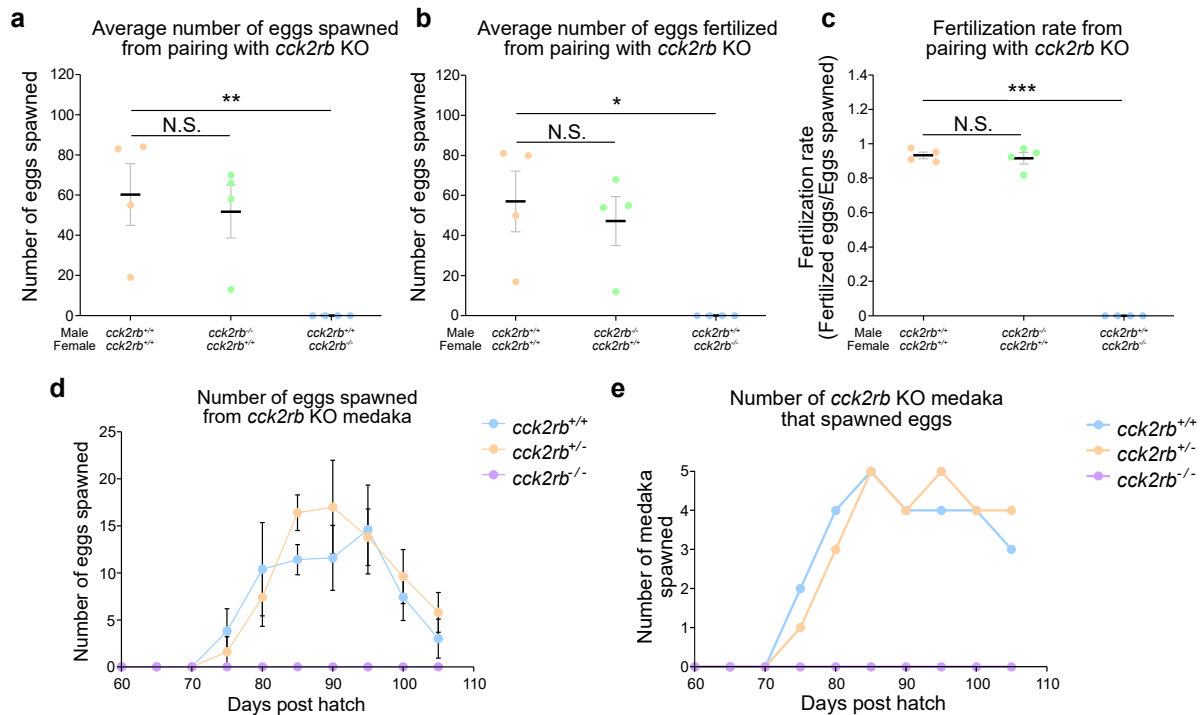

**Supplementary Fig. 4. Eggs spawned from *cck2rb* medaka of each genotype.**

**a,b** The number of eggs spawned (a) and fertilized eggs (b) from wild type or *cck2rb*<sup>-/-</sup> female medaka paired with wild type or *cck2rb*<sup>-/-</sup> male medaka ( $n = 4$  pairs; \*\*,  $p = 0.0096$ ; \*,  $p = 0.0011$ ). The data are mean  $\pm$  SEM. **c** The fertilization rate of each paired groups determined by the number of eggs spawned over the number of fertilized eggs ( $n = 4$  pairs; \*\*\*,  $p = 2.1 \times 10^{-6}$ ). The data are mean  $\pm$  SEM. **d** The number of eggs spawned from female of each genotype paired with wild type male ( $n = 5$  pairs). The data are mean  $\pm$  SEM. **e** The number of females that spawned eggs in each genotype when paired with a wild type male. No eggs were spawned from *cck2rb*<sup>-/-</sup> while *cck2rb*<sup>+/+</sup> and *cck2rb*<sup>+/-</sup> spawned. \* $p < 0.05$ , \*\* $p < 0.01$ , \*\*\* $p < 0.001$ , N.S., not significant, two-sided Dunnett's test (a-c). Source data are provided as a Source Data file.

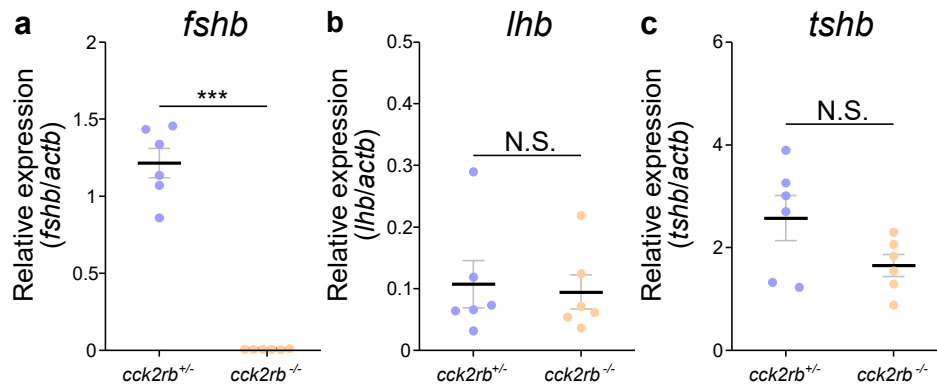

**Supplementary Fig. 5. *lhb* expression in *cck2rb*<sup>-/-</sup> shows similar level as that in *cck2rb*<sup>+/+</sup> in ovariectomized fish, suggesting that the reduction of *lhb* in *cck2rb* KO should be a secondary effect.**

The effect of *cck2rb* knockout in ovariectomized (OVX) females ( $n = 6$  fish). **a** *fshb* mRNA expression of the pituitary of *cck2rb*<sup>-/-</sup> by quantitative real-time polymerase chain reaction (qRT-PCR). **b** *lhb* mRNA expression of *cck2rb*<sup>+/+</sup> and *cck2rb*<sup>-/-</sup>. **c** *tshb* expression of the pituitary extracted from both genotype. The data are mean  $\pm$  SEM. \*\*\*,  $p = 5.5e-5$ ; N.S., not significant; two-sided Student's *t*-test (**a-c**). Source data are provided as a Source Data file.

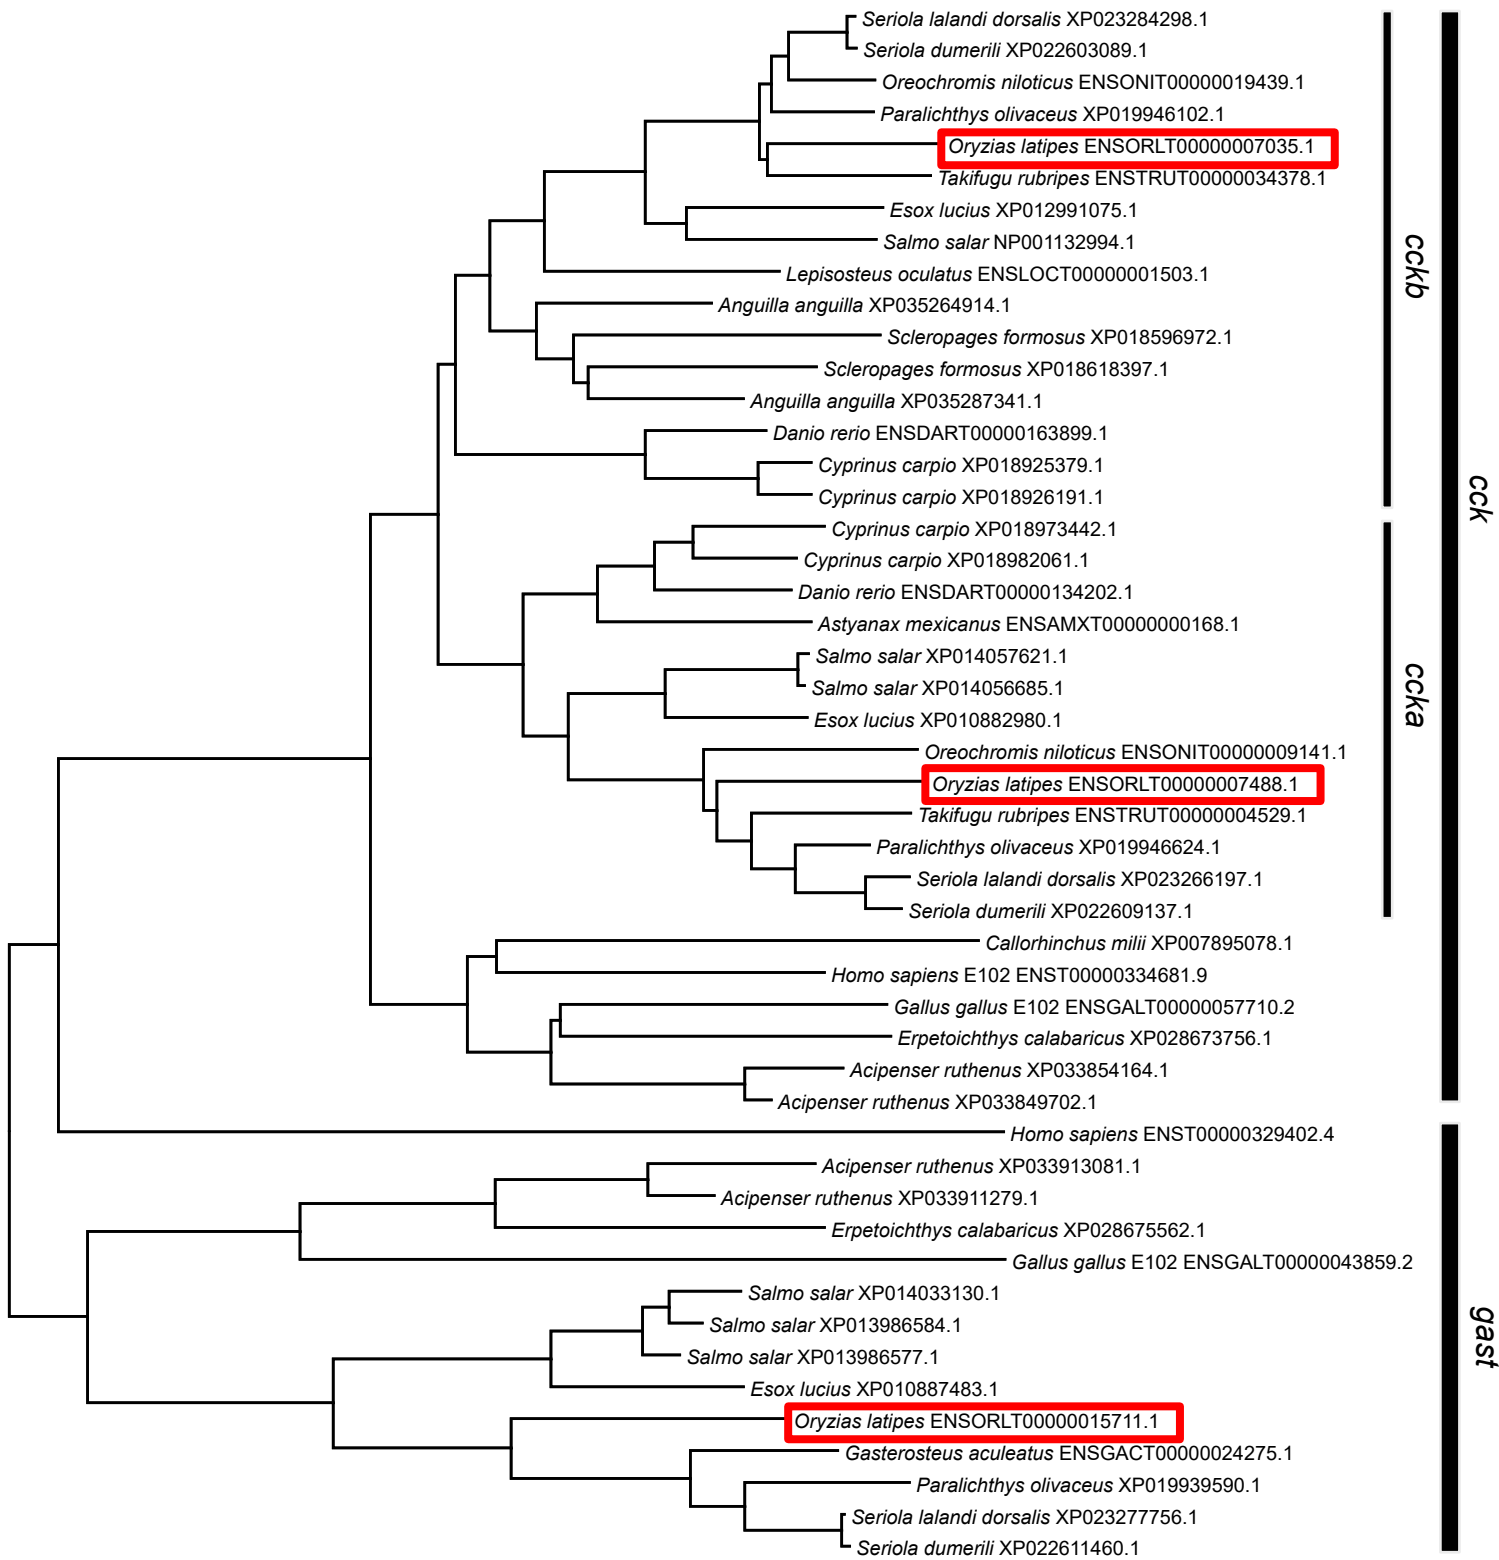

**Supplementary Fig. 6. Phylogenetic tree of medaka cholecystokinin (*ccka* and *cckb*) and gastrin (*gast*).**

Maximum likelihood tree of the *ccka*, *cckb*, and *gast* based on deduced amino acid sequence. Species name and the accession number for each species are indicated in the tree.

```

          *           20           *
ChickCck  : MYGG-TCICVLLAALSVSSSLGQQPAGSHDGSP----- : 31
GarCck    : MNSG-ICVCVLLAVLSTSSCLGRPASGSEDEG----- : 30
ZebraCcka : MNAG-ICVCAALLAALSTSSCLSLPVSSEDG----- : 29
MedakaCcka : MNVG-IYVCVILAALFTGSLTLPSKSMFQR----- : 29
ZebraCckb : MNSG-VCVCVILAALSVS-----VSCASR----- : 23
MedakaCckb : MTAG-LGVCVLLAVLCTSSCLGLPVSSAPSDEGQHLSA : 37
ChickGast : MKTK-VFLGLILSAAVTACLCRPAAKAPGGS----- : 30
GarGast   : MPGSKVCLCALIVTVLAAVCLAVPLPETLGD----- : 31
ZebraGast : MMAKFIVLT--IVAMLVAACAASPLSK----- : 25
MedakaGast : MSGKTALLFALLVVLVSSSASPAAKAE--GG----- : 29

          40           *           60           *
ChickCck  : ---VAAELQQSLTEPHRHSR---APSSAGPLKPAPRL- : 62
GarCck    : ---TPAQLGQSLSAPRRAR---SAPPHGQPQPFQRA- : 61
ZebraCcka : ---VQSNVG-SATGHRHTR---AAPPAGQINLLTKP- : 59
MedakaCcka : ---TERKALVTESLPVPLTN---HTRQARSAPAPPSGQ : 61
ZebraCckb : -----PVSDERSLSARRLA---RSASLTLQQPLPPAG : 52
MedakaCckb : PSEVALPEADTKSLDGAHVR---HSRSTTQLKDLPGA- : 71
ChickGast : -----HRPNSSLAR----- : 39
GarGast   : ---AGAALHRDALRERARALRERTPSGAPRDPAQGAR : 66
ZebraGast : ---VKPVNTKRSA-----ISPESPE--AHETP : 48
MedakaGast : ---TG-ALAHKGA-----EPTGRMR-----A : 46

          80           *           100           *
ChickCck  : DGSFEQRATIGALLAKYLQQAWKGSTGRFSSVLGNRVQS : 100
GarCck    : EEAAEQRASLGE LLARLLNR--KGSFRRNSTANSKASG : 97
ZebraCcka : EDDEEPRSSLTE LLARLI ST--KGSYRRSPAANSRT-- : 93
MedakaCcka : LQSESAQNSLSOLLARLLSRK-SSSLQTRSSLTSR--A : 96
ZebraCckb : DIQPDTRANLSOLLAKLIS SK-KGSVRRNSSMNSR--A : 87
MedakaCckb : EEDGDSRANLSE LLARLIS TR-KGSVRRNSSANNRGGV : 108
ChickGast : --RDWPEPPSQEQQRFI SRFLPHVFAELSDRKGFVQG : 75
GarGast   : VARQDRLGSLTEEQRDIVSRYVLQALTELAHREGCS-- : 102
ZebraGast : LARVRRSVGLSE DQREIMSRQLLQALSEIIQREDC--- : 83
MedakaGast : ATRERRRAHLTE DEREMMTKQIVQALSEVMNSD-C--- : 80

          120           *           140
ChickCck  : IDPTHRINDRDYMGWMDFGRRSAEEYEYSS : 130
GarCck    : LSAHRIKDRDYLGWMDFGRRSAEEYEYSS : 127
ZebraCcka : MGASHRIKDRDYLGWMDFGRRSAEEYEYSS : 123
MedakaCcka : AAPSHRIKDRDYLGWMDFGRRSVEEYEYSSP : 126
ZebraCckb : NSVNHRIDRDYVGWMDFGRRSAEEYEYSS : 117
MedakaCckb : LRANHRIDRDYLGWMDFGRRSAEEYEYSS : 138
ChickGast : NGAVEALHDHFYPDWMDFGRRSTEDAADAA : 105
GarGast   : DDHPINISDRDYHGWMDFGRRSAEELDS-- : 130
ZebraGast : -----LS--DYQGWDVDFGRRSSN----- : 99
MedakaGast : -----MSDRDYRGWLDFGRRDAE----- : 98

```

**Supplementary Fig. 7. Alignment of amino acid sequence of vertebrate CCK and gastrin.**

Alignment of medaka (MedakaCcka, ENSORLT0000007488.1; MedakaCckb, ENSORLT0000007035.1; gast, ENSORLT00000015711.1) compared with zebrafish (ZebraCcka, ENSDART00000134202.1; ZebraCckb, ENSDART00000163899.1; ZebraGast, XP\_021335429.1), gar (GarCck, ENSLOCT00000001503.1; GarGast, XP\_006638439.1) and chicken(ChickCck, ENSGALT00000057710.2; ChickGast, ENSGALT00000043859.2). The red horizontal line indicates the C-terminal CCK octapeptide (CCK-8). Black shading represents identical residues while gray shading represents similar residues.

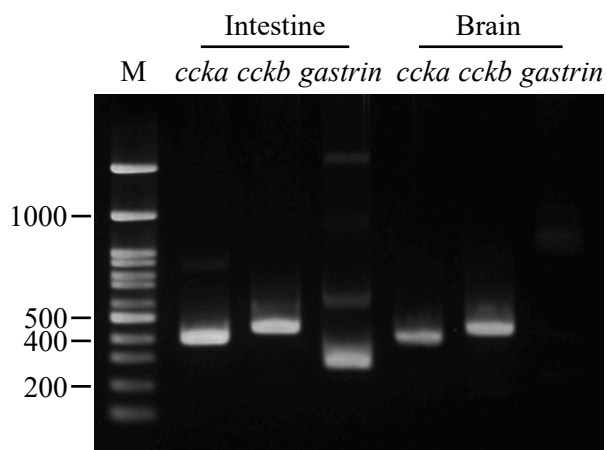

**Supplementary Fig. 8. *ccka* and *cckb* but not *gastrin* is expressed in the brain.**

Reverse transcription polymerase chain reaction (RT-PCR) analysis of the medaka brain and intestine. cDNA of brain and intestine were examined for PCR using *ccka*- (381-bp), *cckb*- (437-bp), and *gastrin*- (295-bp) specific primers and resolved in 2% agarose gel electrophoresis. *ccka* and *cckb* were amplified from both brain and intestine cDNA, whereas *gastrin* was amplified only from the intestine cDNA. Source data are provided as a Source Data file.



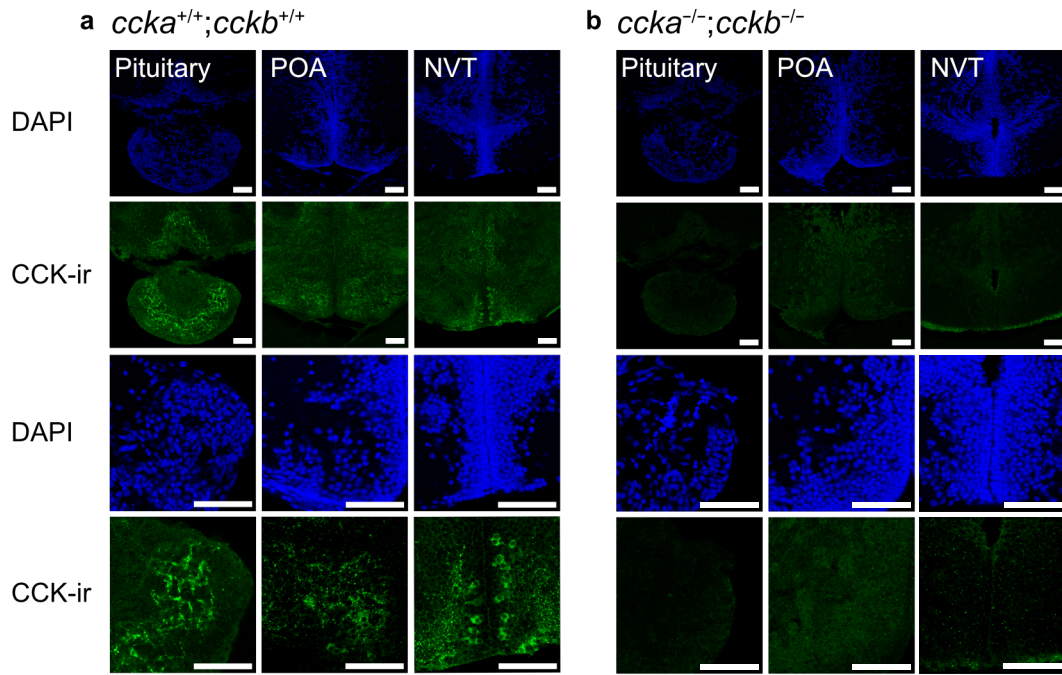

**Supplementary Fig. 9. *ccka* and *cckb* knockout fish do not have CCK-immunoreactive cell bodies and fibers.**

**a** Immunohistochemistry of *ccka* and *cckb* double knockout medaka, using CCK antibody. Cell bodies and fibers were observed in the pituitary, preoptic area (POA), and nucleus ventralis tuberis (NVT) of *ccka*<sup>+/+</sup>;*cckb*<sup>+/+</sup> medaka. **b** No cell bodies or fibers were observed in *ccka*<sup>-/-</sup>;*cckb*<sup>-/-</sup> medaka. The bottom half of the figures are in higher magnification. Scale bars, 50  $\mu$ m.

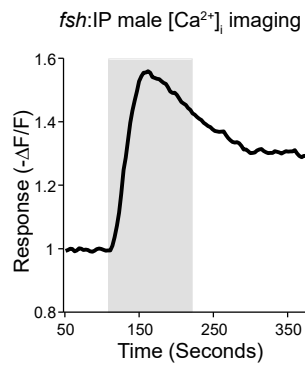

**Supplementary Fig. 10. Increased [Ca<sup>2+</sup>]<sub>i</sub> in FSH cells in male in response to CCK-8s peptide.**

FSH cells in male was applied with 1000 nM CCK-8s peptide. The shaded section indicates the time and duration of the perfusion of CCK-8s. During the application of peptide, FSH cells showed drastic increase of [Ca<sup>2+</sup>]<sub>i</sub> which is similar to the response in females. Source data are provided as a Source Data file.

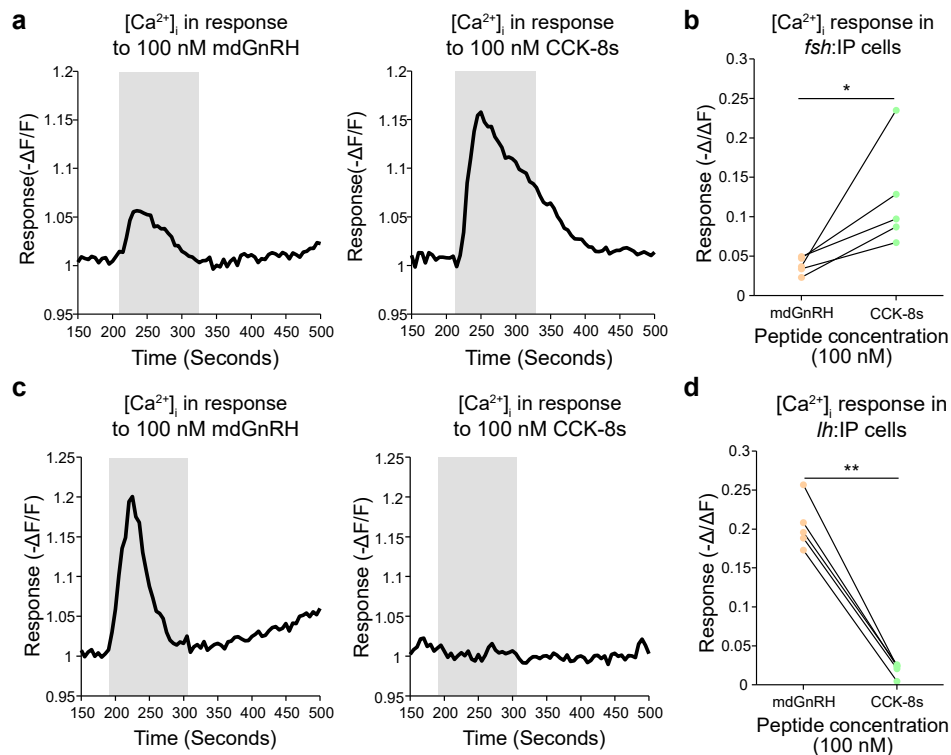

**Supplementary Fig. 11. [Ca<sup>2+</sup>]<sub>i</sub> of FSH cells when perfused with 100 nM mdGnRH or 100 nM CCK-8s peptide.**

**a** Ca<sup>2+</sup> imaging of FSH cells applied with 100 nM mdGnRH or 100 nM CCK-8s. The shaded section indicates the time and duration of the perfusion of the peptide.

**b** The response of FSH cells to CCK-8s peptide is significantly greater than that to mdGnRH at 100 nM ( $n = 5$  fish; \*,  $p = 0.022$ ).

**c** Ca<sup>2+</sup> imaging of LH cells applied with 100 nM mdGnRH or 100 nM CCK-8s. The shaded section indicates the time and duration of the perfusion of the peptide.

**d** The response of LH cells to mdGnRH is significantly greater than that to CCK-8s at 100 nM ( $n = 5$  fish; \*\*,  $p = 0.0012$ ). \* $p < 0.05$ , \*\* $p < 0.01$ , two-sided Student's  $t$ -test (**b, d**). Source data are provided as a Source Data file.

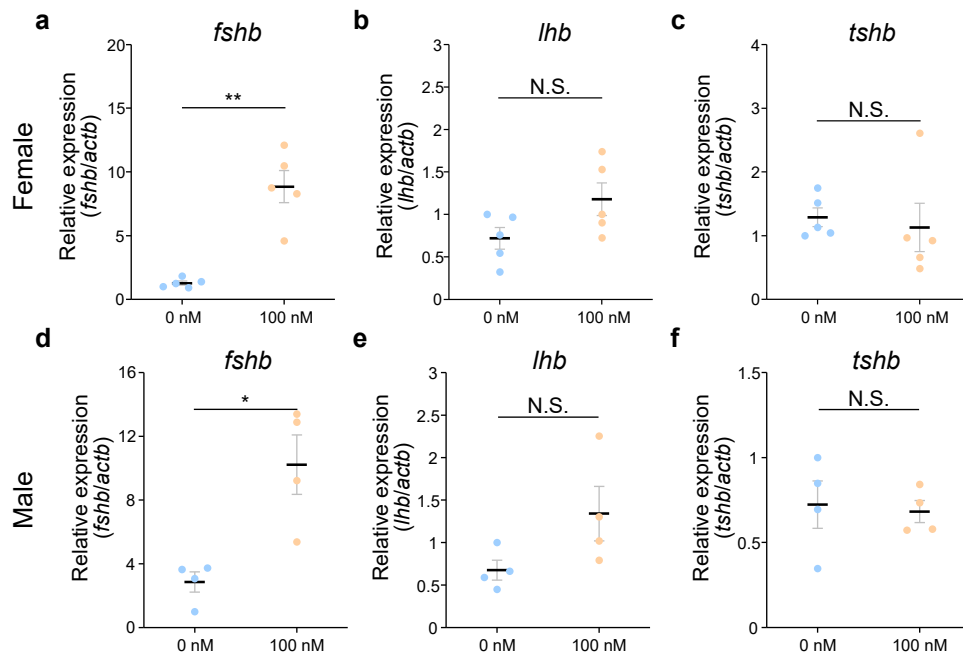

**Supplementary Fig. 12. CCK-8s exclusively increases the *fshb* expression.** Since there might be an increasing trend in *lhb* expression after incubation with CCK-8s, similar experiments were reexamined for both female and male. **a-f** qRT-PCR of the pituitaries after incubating in CCK-8s for 48 hours (a and d, *fshb*; b and e, *lhb*; c and f, *tshb*;  $n = 5, 4$  fish). Only *fshb* expression was significantly different between the pituitary incubated with or without 100 nM CCK-8s. The data are mean  $\pm$  SEM.  $**p = 0.0057$ ,  $*p = 0.014$ , N.S., not significant, two-sided Student's *t*-test (**a-f**). Source data are provided as a Source Data file.

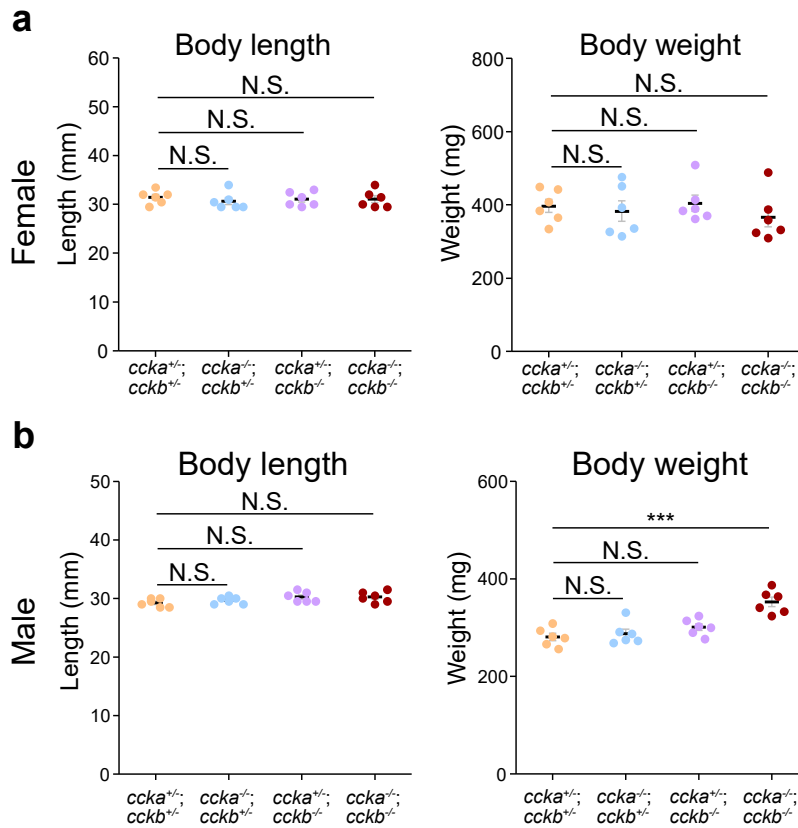

**Supplementary Fig. 13. Body length and weight are mostly same among *ccka* and *cckb* double KO.**

**a** The body length and weight of *ccka*<sup>+/-</sup>;*cckb*<sup>+/-</sup>, *ccka*<sup>-/-</sup>;*cckb*<sup>+/-</sup>, *ccka*<sup>+/-</sup>;*cckb*<sup>-/-</sup>, and *ccka*<sup>-/-</sup>;*cckb*<sup>-/-</sup> female medaka ( $n = 6$  fish). **b** The body length and weight of male *ccka/cckb* double KO ( $n = 6$  fish). The data are mean  $\pm$  SEM. \*\*\*,  $p = 2.41 \times 10^{-5}$ ; N.S., not significant; two-sided Dunnett's test (**a,b**). Source data are provided as a Source Data file.

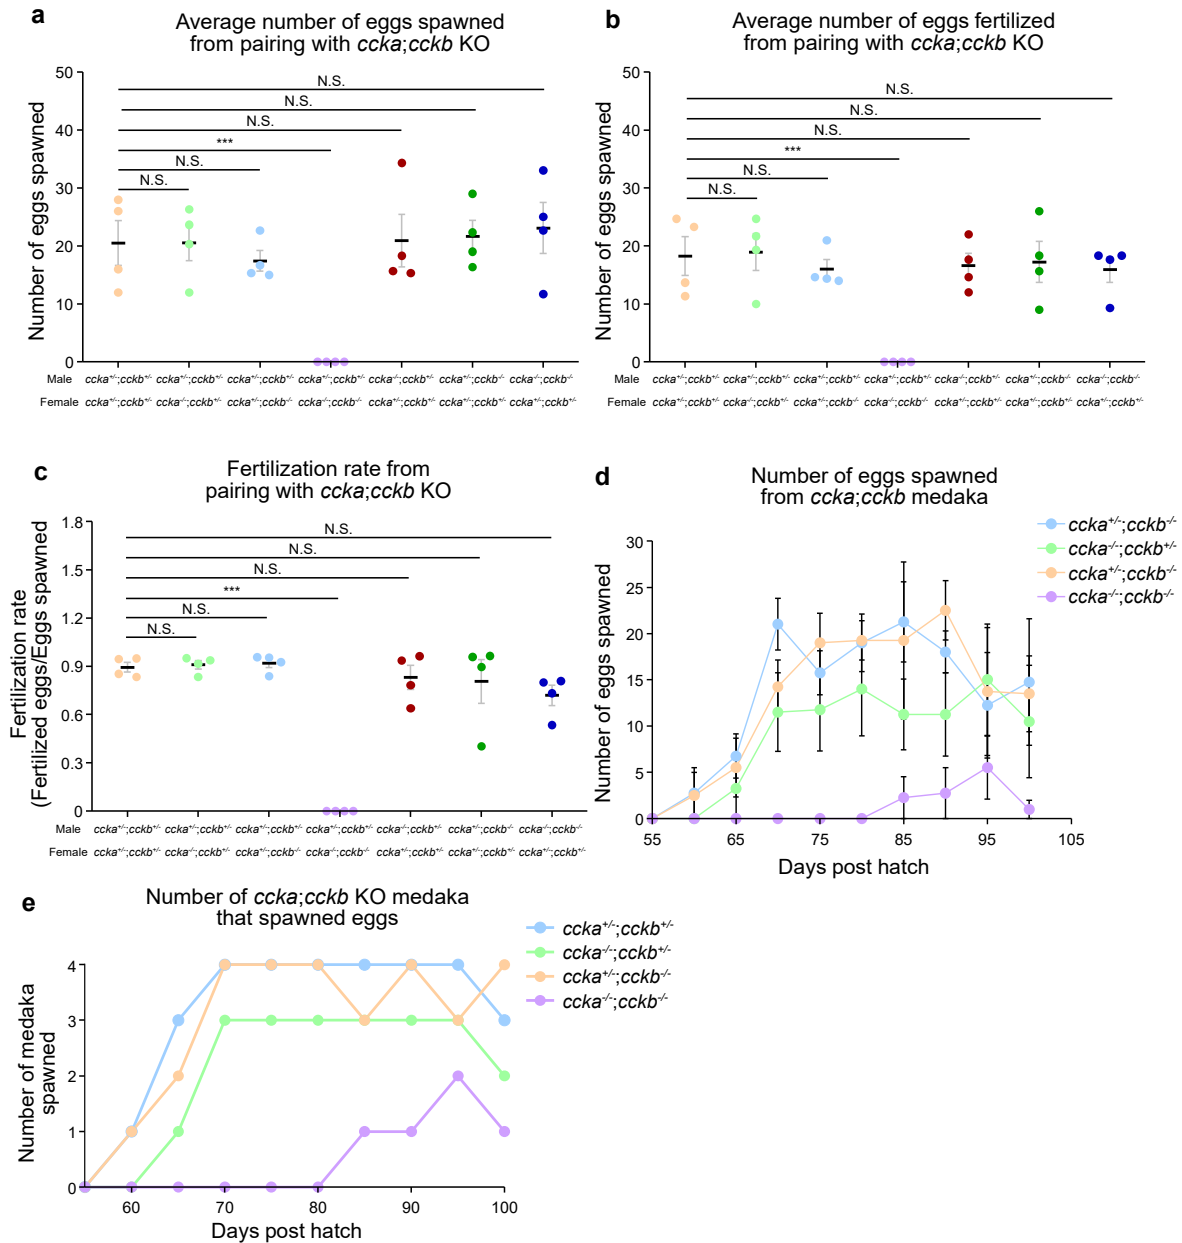

**Supplementary Fig. 14. Eggs spawned from *ccka;cckb* medaka of each genotype**

**a,b** The number of eggs spawned (a) and fertilized eggs (b) from wild type or *ccka;cckb* KO female medaka paired with wild type or *ccka;cckb* KO male medaka ( $n = 4$  pairs; \*\*\*,  $p = 0.0012$ ,  $3.0e-4$ ). The data are mean  $\pm$  SEM. **c** The fertilization rate of each paired groups determined by the number of eggs spawned over the number of fertilized eggs ( $n = 4$  pairs; \*\*\*,  $p = 1.4e-6$ ). The data are mean  $\pm$  SEM. **d** The number of eggs spawned from female of each genotype paired with wild type male ( $n = 4$  pairs). The data are mean  $\pm$  SEM. **e** The number of females that spawned eggs in each genotype. *ccka*<sup>-/-</sup>;*cckb*<sup>-/-</sup> medaka began to lay eggs about one month after the other genotypes. \*\*\* $p < 0.001$ , N.S., not significant, two-sided Dunnett's test (a-c). Source data are provided as a Source Data file.

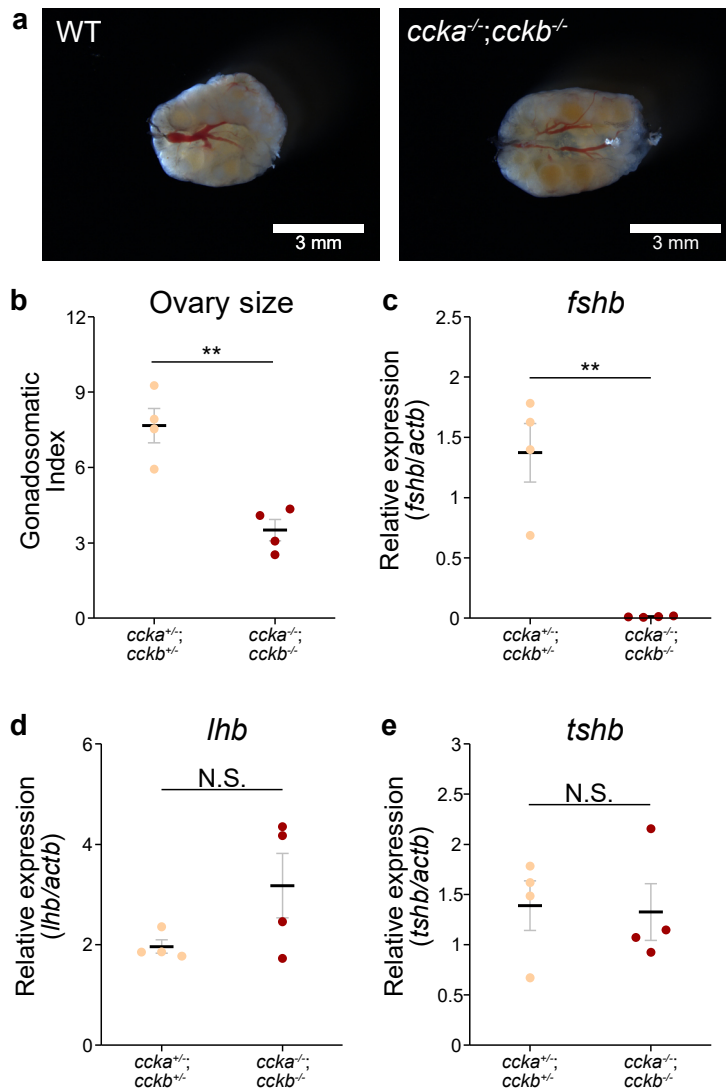

**Supplementary Fig. 15. *ccka/cckb* double KO females show delayed spawning with their drastically reduced FSH expression**

**a** *ccka*<sup>-/-</sup>;*cckb*<sup>-/-</sup> showed functional ovary after a delay of ~1 month. **b** The gonadosomatic index (GSI) of ovary size normalized by body weight ( $n = 4$  fish; \*\*,  $p = 0.0021$ ). **c,d** Quantitative real-time polymerase chain reaction (qRT-PCR) of *fshb* expression (c) and *lhb* expression (d) in *ccka*<sup>+/-</sup>;*cckb*<sup>+/-</sup> and *ccka*<sup>-/-</sup>;*cckb*<sup>-/-</sup>. **e** *tshb* expression of both genotype ( $n = 4$  fish; \*\*,  $p = 0.00013$ ). The data are mean  $\pm$  SEM. \*\*,  $p < 0.01$ , N.S., not significant, two-sided Student's *t*-test (b-c). Source data are provided as a Source Data file.

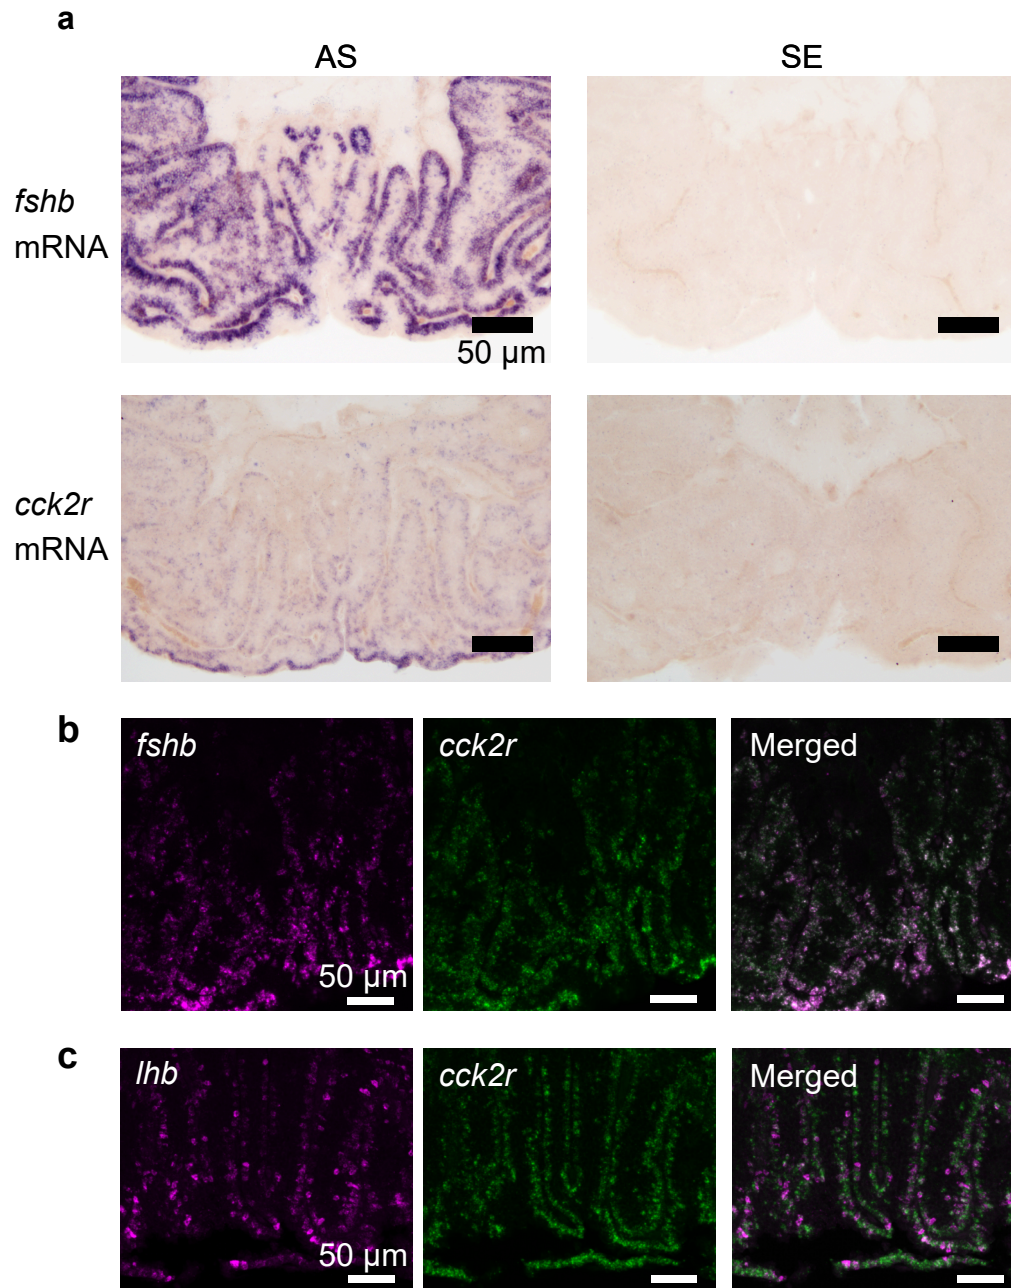

**Supplementary Fig. 16.** *fshb* and *cck2r* are expressed in the pituitary of Japanese eel.

**a** *in situ* hybridization of the pituitary in Japanese eel, analyzing the expression of *fshb* and *cck2r* by *in situ* hybridization. Only sections hybridized with anti-sense probe were labeled for both *fshb* and *cck2r*. **b,c** Double *in situ* hybridization of *fshb* (**b**), *lhb* (**c**) and *cck2r* (**b** and **c**) in the pituitary. Co-expression between *fshb* and *cck2r* was observed, but no co-expression was observed between *lhb* and *cck2r*.



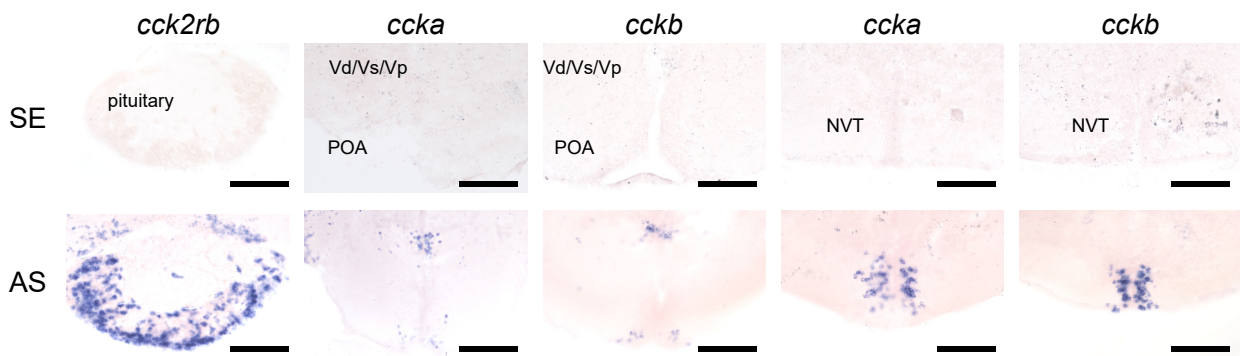

**Supplementary Fig. 17. Specific *in situ* hybridization of *cck2rb*, *ccka*, and *cckb*.**

*in situ* hybridization of *cck2rb*, *ccka*, and *cckb*. Only the sections hybridized with anti-sense probes (AS) were labeled whereas sections hybridized with sense probes (SE) did not show any signal which supports the validity of this labeling. Scale bars, 100  $\mu$ m.

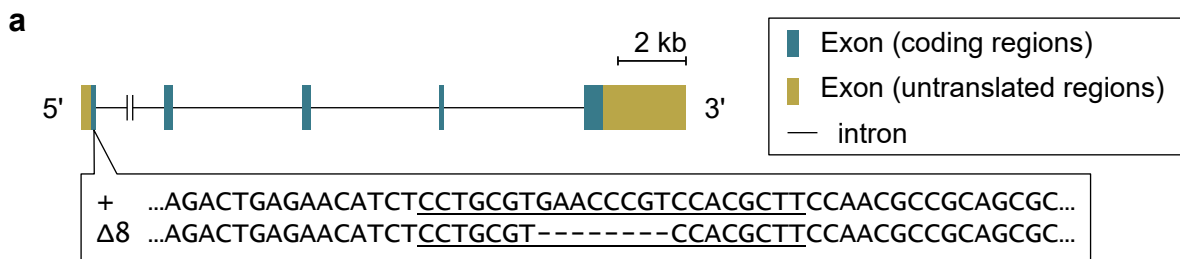

**b**

|            |                                                                           |     |
|------------|---------------------------------------------------------------------------|-----|
| +          | MDTLRNETASTIECVAGALMEQLQSRAAYNGSLETENISCVNPSTLPTPQVRVHREEGHT              | 60  |
| $\Delta 8$ | MDTLRNETASTIECVAGALMEQLQSRAAYNGSLETENISCVHASNAAARETQRRGPHAPD              | 60  |
| +          | LRILLYSLIFFLSVFGNLLIIVVLTVNKRMRTVTNTFLLSLAVSDLMMMAIFCMPFTLIPN             | 120 |
| $\Delta 8$ | PALLAHLLECLWKPAHHC <del>GPCQ</del> AN <del>AHRH</del> *                   | 92  |
| +          | ILKDFIFGAAMCKIVSYLMGISVSISTFSLVAIAIERYSAICNPLKSRVWQTRSHAYRVI              | 180 |
| +          | AATWVLAFIIMVPYPIISHLEPFQGSANTTAHKCRHKWPIQTAEQTWYVMLLLILFAIPG              | 240 |
| +          | VVMIIAYGLISRELYRGIRFEMGQKKDSTDVKNGLTSTVSNVSDDGDCYVTVVQRPHSM               | 300 |
| +          | MSTMAASIRQVKADRPRSNTSEAKLEAKKRVIRMLVVIVVLFFLCWMPLYCVNTWRAFDD              | 360 |
| +          | SSATRALS <del>GAPIAFIHL</del> LSYTSACVNPIIYCFMNTRFRKALLSTFSWCGAPCRHCCRRRG | 420 |
| +          | LRDIEEDVMATGASMSKFSYTTVSTMGNC                                             | 449 |

**Supplementary Fig. 18. Generation of *cck2rb* KO medaka.**

**a** The gene structure of *cck2rb* is shown with the location of the CRISPR target site, which is enlarged to depict the nucleotide sequences of the wild-type (+) and targeted allele ( $\Delta 8$ ). The deleted nucleotides are indicated by dashes. **b** Comparison of the deduced Cck2rb protein sequences of the + and targeted allele ( $\Delta 8$ ). The transmembrane domain of Cck2rb are shaded in gray. The altered sequences caused by frameshift are indicated in red.

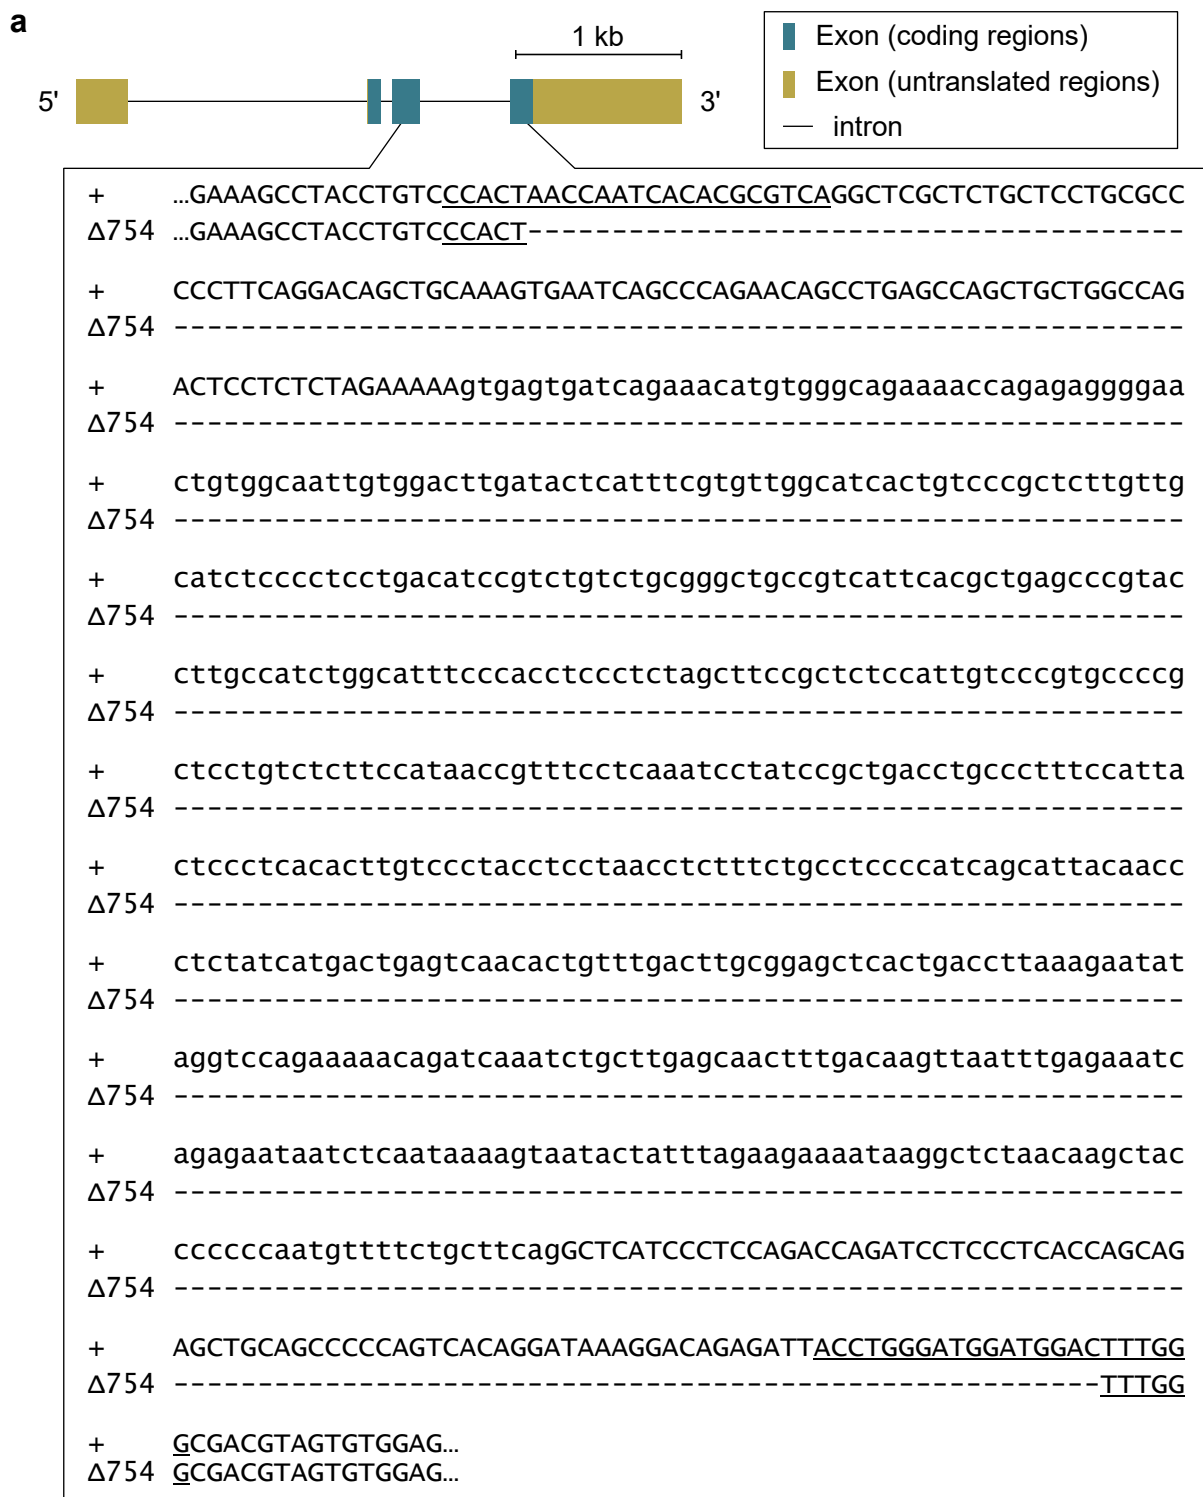

**b**

```

+ MNVGIYVCVILAALFTGSLTLPKSMRTERKALVTESLPVPLTNHTRQARSAPAPPSGQL 60
Δ754 MNVGIYVCVILAALFTGSLTLPKSMRTERKALVTESLPVPL LGDVVWRSMNIPHKAASF 60

+ QSESAQNSLSQLLARLLSRKSSSLQTRSSLT SRAAAPSHRIKDRDYLGWMDFGRRSVEEY 120
Δ754 ISQHLNQSPKTRFTLLILHQMREDFSSF* 89

+ EYSP 124

```

**Supplementary Fig. 19. Generation of *ccka* KO medaka.**

**a** The gene structure of *ccka* is shown with the location of the CRISPR target site, which is enlarged to depict the nucleotide sequences of the wild-type (+) and targeted allele ( $\Delta 754$ ). The deleted nucleotides are indicated by dashes. **b** Comparison of the deduced Ceka protein sequences of the wild-type (+) and targeted allele ( $\Delta 754$ ). The signal peptide region (1-20) and amino acid residue essential for CCK activity are shaded in gray. The altered sequences caused by frameshift are indicated in red.

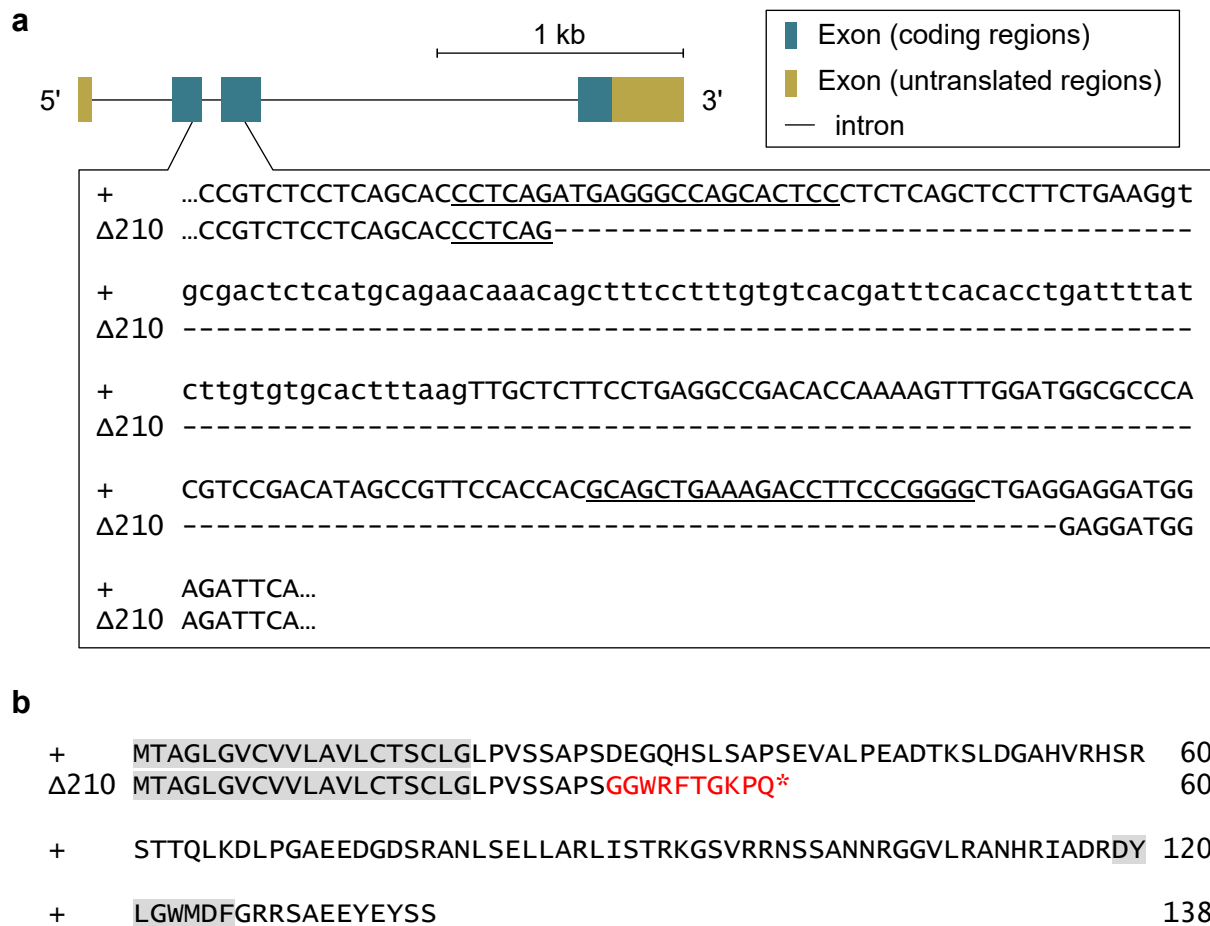

**Supplementary Fig. 20. Generation of *cckb* KO medaka.**

**a** The gene structure of *cckb* is shown with the location of the CRISPR target site, which is enlarged to depict the nucleotide sequences of the wild-type (+) and targeted allele ( $\Delta 210$ ). The deleted nucleotides are indicated by dashes. **b** Comparison of the deduced Cckb protein sequences of the wild-type (+) and targeted allele ( $\Delta 210$ ). The signal peptide region (1-20) and amino acid residue essential for CCK activity are shaded in gray. The altered sequences caused by frameshift are indicated in red.

| gene_id            | Gene name      | annotation                                      | Median TPM value of FSH cell pools (n=4) |
|--------------------|----------------|-------------------------------------------------|------------------------------------------|
| ENSORLG00000017966 | <i>cck2rb</i>  | cholecystokinin receptor-like                   | 542.79                                   |
| ENSORLG00000019757 | <i>gnrh-r2</i> | gonadotropin-releasing hormone receptor 2       | 449.315                                  |
| ENSORLG00000016288 | <i>tgfbr3</i>  | transforming growth factor beta receptor type 3 | 442.8                                    |
| ENSORLG00000000865 | <i>chrna4b</i> | neuronal acetylcholine receptor subunit alpha-2 | 267.245                                  |
| ENSORLG00000014011 | <i>pgrmc1</i>  | progesterone receptor membrane component 1      | 247.1                                    |
| ENSORLG00000030131 | <i>pk1-r</i>   | pyrokinin-1 receptor-like                       | 224.915                                  |
| ENSORLG00000024060 | <i>nr1d2b</i>  | nuclear receptor subfamily 1 group D member 2   | 199.77                                   |

Supplementary Table 1. List of highly expressed receptors in the RNAseq analysis of FSH cells

| EC50                       | CCK-8s | Gastrin-8s |
|----------------------------|--------|------------|
| pGL4.29(cAMP)              | 0.2 nM | 9.1 nM     |
| pGL4.30(Ca <sup>2+</sup> ) | 0.7 nM | 1.8 nM     |
| pGL4.33(MAPK)              | 1.0 nM | 1.8 nM     |

Supplementary Table 2. EC50 values of the reporter assay using HeLa cells expressing Cck2rb.

| Target           | direction | purpose                                              | sequence (5' to 3')                  |
|------------------|-----------|------------------------------------------------------|--------------------------------------|
| <i>cck2rb</i>    | forward   | genotyping (gDNA PCR)                                | AAAGACGGAGAGCCAAAGACAG               |
| <i>cck2rb</i>    | reverse   | genotyping (gDNA PCR)                                | TGCAGAGATAGCTTTCTCCAAGAT             |
| <i>cck2rb</i>    | forward   | genotyping (HRM)                                     | CTGATGGAGCAGCTTCAGAGC                |
| <i>cck2rb</i>    | reverse   | genotyping (HRM)                                     | TGCTGCGCTTCTCCTGTCGT                 |
| <i>cck2rb</i>    | forward   | genotyping (HRM)                                     | ATCTCCTGCGTGAACCCGTCACGCTT           |
| <i>ccka</i>      | forward   | genotyping (gDNA PCR)                                | GTGTCTAATCCCAATTCAGAAAGTG            |
| <i>ccka</i>      | reverse   | genotyping (gDNA PCR)                                | AAGCTGACAAGCTGTGCCTCTT               |
| <i>ccka</i>      | forward   | genotyping (CS)                                      | ATCCTGGCTGCTCTTTTCACTG               |
| <i>cckb</i>      | forward   | genotyping (gDNA PCR)                                | AGCTCCTCACATGACTGAAGCT               |
| <i>cckb</i>      | reverse   | genotyping (gDNA PCR)                                | AGTGGCAGGAAAAAGCACTCG                |
| <i>cckb</i>      | forward   | genotyping (CS)                                      | AAACGCTCCGCTTCTGTCTGTG               |
| <i>cck2rb</i>    | forward   | Probe template                                       | CTGATCTCCAGGGAACCTTATCG              |
| <i>cck2rb</i>    | reverse   | Probe template                                       | GCAGGAGAAAGTATGGAGTACAG              |
| <i>ccka</i>      | forward   | Probe template                                       | ACTGTTTGAAAGCCTCAGCACCA              |
| <i>ccka</i>      | reverse   | Probe template                                       | CCCTAGTAGATGATTTGATATGAAGATT         |
| <i>cckb</i>      | forward   | Probe template                                       | GAACTGCTCTCCTCACTCTCATA              |
| <i>cckb</i>      | reverse   | Probe template                                       | GCAGCGAAGCAGCTTTTTGCTG               |
| <i>ccka</i>      | forward   | RT-PCR                                               | GCAGTCATGAATGTAGGAATCTACGT           |
| <i>ccka</i>      | reverse   | RT-PCR                                               | TTATGGGGAATATTCATACTCCTCCACAC        |
| <i>cckb</i>      | forward   | RT-PCR                                               | TTCTCTCCTCAAGATGACCGCTG              |
| <i>cckb</i>      | reverse   | RT-PCR                                               | AAGAGTACGAGTACTCCTCATAAGGG           |
| <i>gastrin</i>   | forward   | RT-PCR                                               | AGGCAGCCATGTCAGGGAAAAC               |
| <i>gastrin</i>   | reverse   | RT-PCR                                               | TCCCTCCTCCCAAAGTCCA                  |
| <i>eel_fshb</i>  | forward   | Probe template for eel                               | CAGATTCACAGTTGCCATGCATCT             |
| <i>eel_fshb</i>  | reverse   | Probe template for eel                               | CATCTATCCCTTGCCGCAGTT                |
| <i>eel_cck2r</i> | forward   | Probe template for eel                               | GCGATGGACGTACAGAACTGAATG             |
| <i>eel_cck2r</i> | reverse   | Probe template for eel                               | CTTCCAGGTGTTGACGGAGTAG               |
| <i>cck2rb</i>    | forward   | cds cloning (including<br>sequence for construction) | CTTGCCGCCATGGATACTTTGAGAAACG<br>AGAC |
| <i>cck2rb</i>    | reverse   | cds cloning (including<br>sequence for construction) | CTCTCAGCAGTTTCCCATGGTG               |
| <i>actb</i>      | forward   | qPCR                                                 | GTGATGTTGATATCCGTAAGGATCTGTA         |
| <i>actb</i>      | reverse   | qPCR                                                 | TCTGGTGGGGCAATGATCTTGA               |
| <i>fshb</i>      | forward   | qPCR                                                 | TGGAGATCTACAGGCGTCGGTAC              |

|                  |         |                      |                               |
|------------------|---------|----------------------|-------------------------------|
| <i>fshb</i>      | reverse | qPCR                 | AGCTCTCCACAGGGATGCTG          |
| <i>lhb</i>       | forward | qPCR                 | TGCCTTACCAAGGACCCCTTGATG      |
| <i>lhb</i>       | reverse | qPCR                 | AGGGTATGTGACTGACGGATCCAC      |
| <i>tshb</i>      | forward | qPCR                 | GCTACTCAAGGGACAGCA            |
| <i>tshb</i>      | reverse | qPCR                 | GCAGCCTCTCTGGATAAGGAA         |
| <i>fshUP+</i>    | Forward | Construct for rescue | CAGAGGGGAGCCACCATGGATACTTTGA  |
| <i>cck2rbSE</i>  |         | transgenic           | GAAACGAGACAGC                 |
| <i>Cck2rbFLA</i> | Reverse | Construct for rescue | GTCGCGGCCGCTTCATCACTTATCGTCGT |
| Gstop+           |         | transgenic           | CATCCTTGTAATCTCCTCCGCAGTTTCCC |
| LinkAS           |         |                      | ATGGTGCTG                     |

---

Supplementary Table 3. Primers used in this study.

gDNA PCR, PCR on genomic DNA; CS, cycle sequence; HRM, high-resolution melt analysis. Unless otherwise specified, all target genes mentioned are from the medaka.
